# Supplementary material
Source: PubMed Central journal article supplement (PMC8940582)
Supplement: 10888_2021_9522_MOESM1_ESM.pdf [file 10888_2021_9522_MOESM1_ESM.pdf]

# Additional Tables

Table A.1: Sectors included in essential activities

| Ateco Code | Nace Code | Nace description                                                                                            |
|------------|-----------|-------------------------------------------------------------------------------------------------------------|
| 1          | A01       | Crop and animal production, hunting and related service activities                                          |
| 3          | A03       | Fishing and aquaculture                                                                                     |
| 5          | B05       | Mining of coal and lignite                                                                                  |
| 6          | B06       | Extraction of crude petroleum and natural gas                                                               |
| 09.1       | B09.1     | Support activities for petroleum and natural gas extraction                                                 |
| 10         | C10       | Manufacture of food products                                                                                |
| 11         | C11       | Manufacture of beverages                                                                                    |
| 13.96.20   | C13.96    | Manufacture of other technical and industrial textiles                                                      |
| 13.94      | C13.94    | Manufacture of cordage, rope, twine and netting                                                             |
| 13.95      | C13.95    | Manufacture of non-wovens and articles made from non-wovens, except apparel                                 |
| 14.12.00   | C14.12    | Manufacture of workwear                                                                                     |
| 16.24.20   | C16.24    | Manufacture of wooden containers                                                                            |
| 17         | C17       | Manufacture of paper and paper products                                                                     |
| 18         | C18       | Printing and reproduction of recorded media                                                                 |
| 19         | C19       | Manufacture of coke and refined petroleum products                                                          |
| 20         | C20       | Manufacture of chemicals and chemical products                                                              |
| 21         | C21       | Manufacture of basic pharmaceutical products and pharmaceutical preparations                                |
| 22.1       | C22.1     | Manufacture of rubber products                                                                              |
| 22.2       | C22.2     | Manufacture of plastic products                                                                             |
| 23.19.10   | C23.19    | Manufacture and processing of other glass, including technical glassware                                    |
| 26.6       | C26.6     | Manufacture of irradiation, electromedical and electrotherapeutic equipment                                 |
| 27.1       | C27.1     | Manufacture of electric motors, generators, transformers and electricity distribution and control apparatus |
| 28.3       | C28.3     | Manufacture of agricultural and forestry machinery                                                          |
| 28.93      | C28.93    | Manufacture of machinery for food, beverage and tobacco processing                                          |
| 28.95.00   | C28.95    | Manufacture of machinery for paper and paperboard production                                                |
| 28.96      | C28.96    | Manufacture of plastics and rubber machinery                                                                |
| 32.50      | C32.5     | Manufacture of medical and dental instruments and supplies                                                  |
| 32.99.1    | C32.99    | Other manufacturing n.e.c.                                                                                  |
| 32.99.4    | C32.99    | Other manufacturing n.e.c.                                                                                  |
| 33         | C33       | Repair and installation of machinery and equipment                                                          |
| 35         | D35       | Electricity, gas, steam and air conditioning supply                                                         |
| 36         | E36       | Water collection, treatment and supply                                                                      |
| 37         | E37       | Sewerage                                                                                                    |
| 38         | E38       | Waste collection, treatment and disposal activities; materials recovery                                     |
| 39         | E39       | Remediation activities and other waste management services                                                  |
| 42         | F42       | Civil engineering                                                                                           |
| 43.2       | F43.2     | Electrical, plumbing and other construction installation activities                                         |
| 45.2       | G45.2     | Maintenance and repair of motor vehicles                                                                    |
| 45.3       | G45.3     | Sale of motor vehicle parts and accessories                                                                 |
| 45.4       | G45.4     | Sale, maintenance and repair of motorcycles and related parts and accessories                               |
| 46.2       | G46.2     | Wholesale of agricultural raw materials and live animals                                                    |
| 46.3       | G46.3     | Wholesale of food, beverages and tobacco                                                                    |
| 46.46      | G46.46    | Wholesale of pharmaceutical goods                                                                           |
| 46.49.2    | G46.49    | Wholesale of other household goods                                                                          |
| 46.61      | G46.61    | Wholesale of agricultural machinery, equipment and supplies                                                 |
| 46.69.19   | G46.69    | Wholesale of other machinery and equipment                                                                  |
| 46.69.91   | G46.69    | Wholesale of other machinery and equipment                                                                  |
| 46.69.94   | G46.69    | Wholesale of other machinery and equipment                                                                  |
| 46.71      | G46.71    | Wholesale of solid, liquid and gaseous fuels and related products                                           |
| 49         | H49       | Land transport and transport via pipelines                                                                  |
| 50         | H50       | Water transport                                                                                             |
| 51         | H51       | Air transport                                                                                               |
| 52         | H52       | Warehousing and support activities for transportation                                                       |
| 53         | H53       | Postal and courier activities                                                                               |
| 55.1       | I55.1     | Hotels and similar accommodation                                                                            |
| J          | J         | Information and communication                                                                               |
| K          | K         | Financial and insurance activities                                                                          |
| 69         | M69       | Legal and accounting activities                                                                             |
| 70         | M70       | Activities of head offices; management consultancy activities                                               |
| 71         | M71       | Architectural and engineering activities; technical testing and analysis                                    |
| 72         | M72       | Scientific research and development                                                                         |
| 74         | M74       | Other professional, scientific and technical activities                                                     |
| 75         | M75       | Veterinary activities                                                                                       |
| 80.1       | N80.1     | Private security activities                                                                                 |
| 80.2       | N80.2     | Security systems service activities                                                                         |
| 81.2       | N81.2     | Cleaning activities                                                                                         |
| 82.20.00   | N82.2     | Activities of call centres                                                                                  |
| 82.92      | N82.92    | Packaging activities                                                                                        |
| 82.99.2    | N82.99    | Other business support service activities n.e.c.                                                            |
| 84         | O84       | Public administration and defence; compulsory social security                                               |
| 85         | P85       | Education                                                                                                   |
| 86         | Q86       | Human health activities                                                                                     |
| 87         | Q87       | Residential care activities                                                                                 |
| 88         | Q88       | Social work activities without accommodation                                                                |
| 94         | S94       | Activities of membership organisations                                                                      |
| 95.11.00   | S95.11    | Repair of computers and peripheral equipment                                                                |
| 95.12.01   | S95.12    | Repair of communication equipment                                                                           |
| 95.12.09   | S95.12    | Repair of communication equipment                                                                           |
| 95.22.01   | S95.22    | Repair of household appliances and home and garden equipment                                                |
| 97         | T97       | Activities of households as employers of domestic personnel                                                 |

*Notes.* The table reports the Ateco 2007 and corresponding NACE Rev.2 codes of sectors included in essential activities, as detailed in the Prime Minister Decree of 22 March 2020.

Table A.2: Share of workers according to observable characteristics across essential and non-essential activities in CICO and INPS data

|            | Non-essential |      | Essential |      |
|------------|---------------|------|-----------|------|
|            | CICO          | INPS | CICO      | INPS |
| Women      | 0.41          | 0.43 | 0.38      | 0.42 |
| Age 15-30  | 0.27          | 0.32 | 0.18      | 0.21 |
| Age 31-50  | 0.53          | 0.49 | 0.56      | 0.53 |
| Age 51-70  | 0.20          | 0.19 | 0.26      | 0.26 |
| Foreign    | 0.20          | 0.18 | 0.15      | 0.14 |
| Part-time  | 0.36          | 0.37 | 0.27      | 0.31 |
| Fixed-term | 0.32          | 0.39 | 0.29      | 0.27 |
| North-West | 0.31          | 0.31 | 0.33      | 0.32 |
| North-East | 0.25          | 0.25 | 0.23      | 0.24 |
| Centre     | 0.22          | 0.21 | 0.22      | 0.21 |
| South      | 0.16          | 0.17 | 0.15      | 0.16 |
| Islands    | 0.06          | 0.06 | 0.06      | 0.07 |

*Notes.* The table reports the share of workers in essential and non-essential activities, as defined by the government decree of 22 March 2020, computed from our sample (CICO) and from social security data (INPS) on the universe of private sector workers. The latter shares are taken from Table 1 in [INPS \(2020\)](#).
